# Supplementary material for: Assessing the Response of Satellite Solar-Induced Chlorophyll Fluorescence and NDVI to Impacts of Heat Waves on Winter Wheat in the North China Plain
Source: Hindawi journal article supplement (doi:10.1155/2020/8873534), 2020-10-29
Supplement: f1 [file 8873534.f1.docx]

## Supplementary Materials


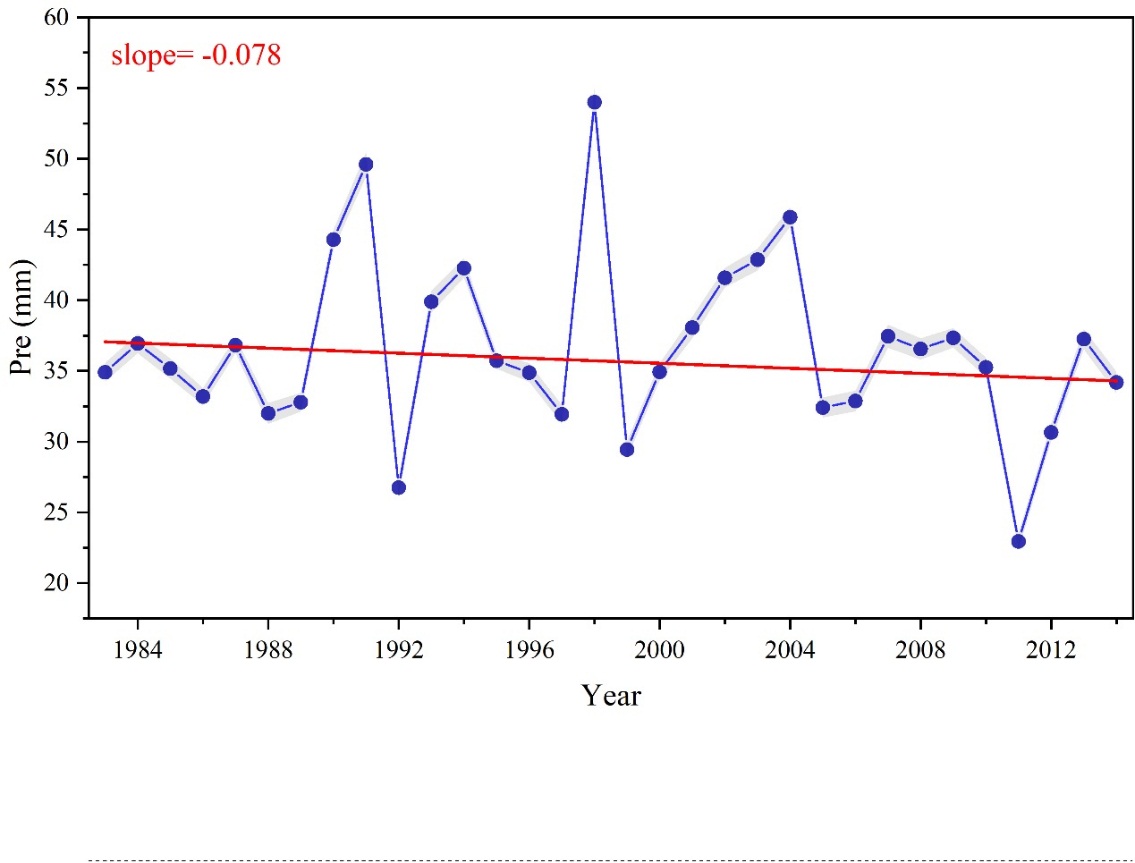


Figure S1: The linear trends of average annual precipitation (Pre).


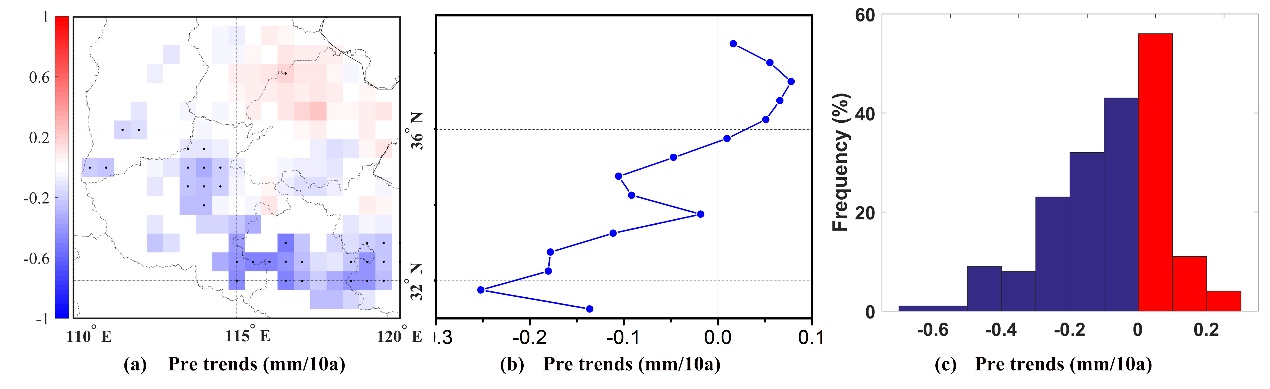


Figure S2: Spatial maps of the trends in the annual mean (a) Pre in the winter wheat growth period from 1983-2014. The black dots in the figures indicate the trends that are statistically significant (P<0.05). The middle panel shows trends of the spatial average of (b) Pre over latitude with 0.5° bins. The right panel shows the histogram of the (c) Pre trends.


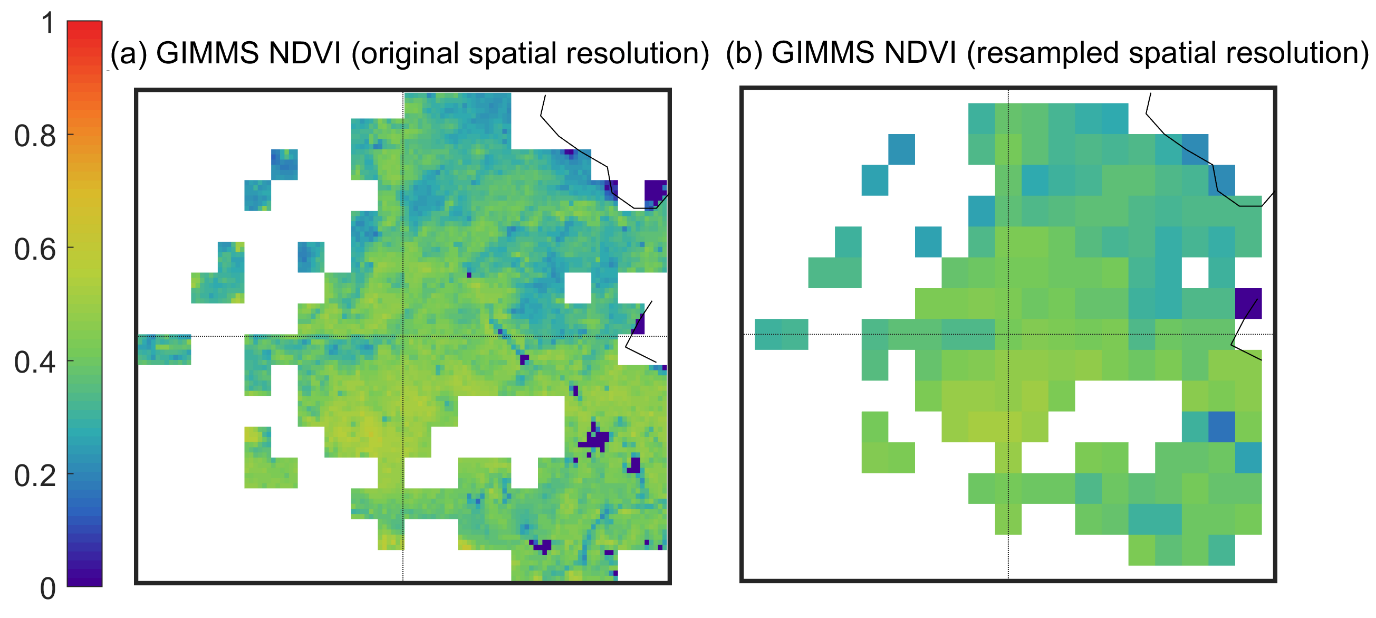


Figure S3: Spatial maps of the 1982-2014 average values of the wheat growing season mean NDVI at (a) the original spatial resolution (1/12°🞨1/12°) and (b) the resampled spatial resolution (0.5°🞨0.5°).


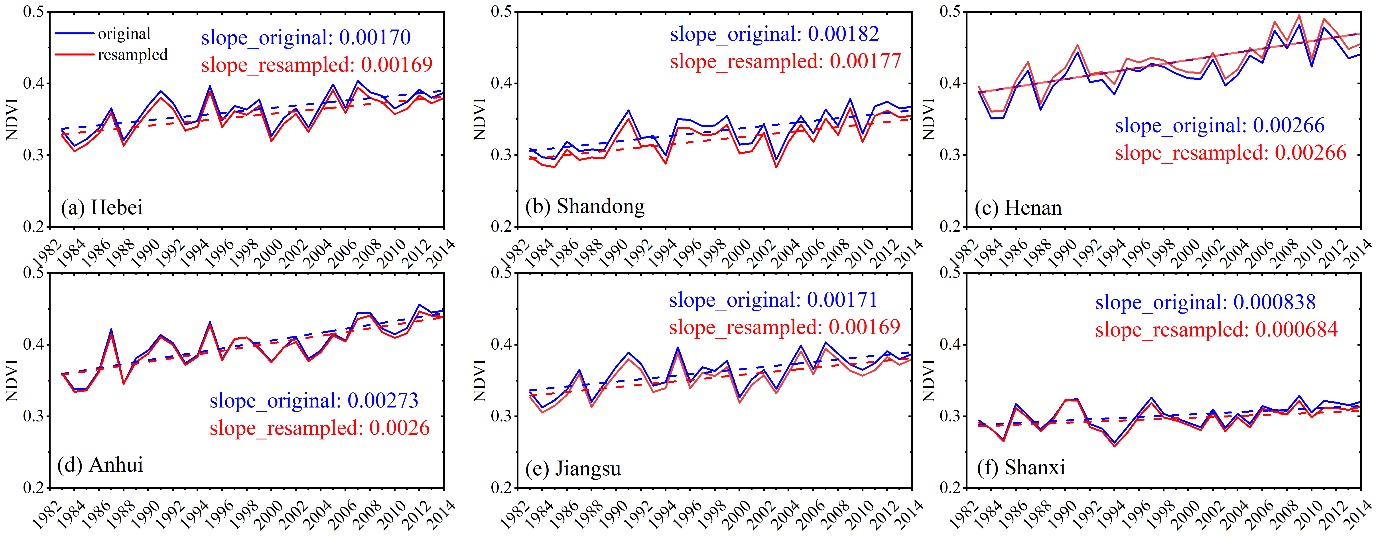


Figure S4: Linear trends of annual average NDVI with original and resampled spatial resolution of (a) Hebei, (b) Shandong, (c) Henan, (d) Anhui, (e) Jiangsu and (f) Shanxi Provinces.
